# Supplementary material for: Insights into the role of molar ratio and added water in the properties of choline chloride and urea-based eutectic mixtures and their cellulose swelling capacity
Source: Royal Society of Chemistry journal article supplement (doi:10.1039/d2cp04119g), 2022-01-01
Supplement: d2cp04119g1.pdf [file d2cp04119g1.pdf]

Insights into role of molar ratio and added water in the properties of choline chloride and urea-based eutectic mixtures and their cellulose swelling capacity

Juho Antti Sirviö<sup>1\*</sup>, Riikka Haataja<sup>1</sup>, Anu M. Kantola<sup>2</sup>, Terhi Suopajarvi<sup>1</sup>, Henrikki Liimatainen<sup>1</sup>

<sup>1</sup> Fibre and Particle Engineering Research Unit, University of Oulu, P.O. Box 4300, 90014 Oulu, Finland E-mail: [juho.sirvio@oulu.fi](mailto:juho.sirvio@oulu.fi)

<sup>2</sup> NMR Research Unit, University of Oulu, P.O.Box 3000, FIN-90014, Oulu, Finland

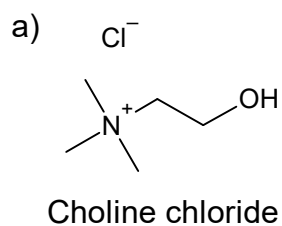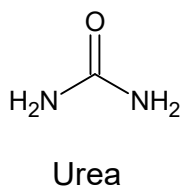

b)

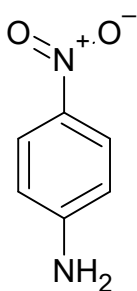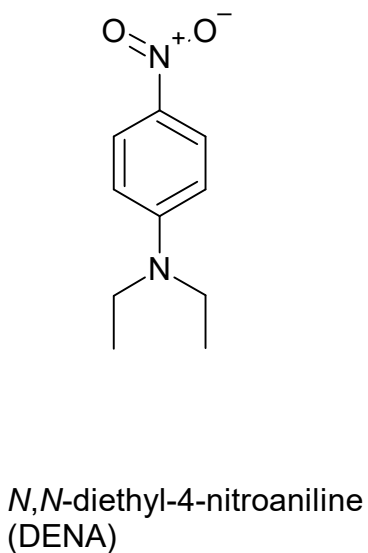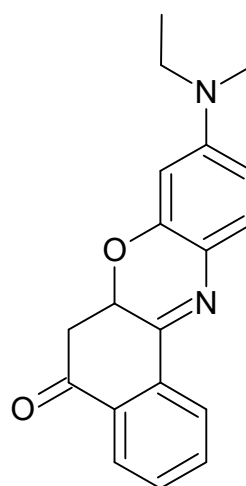

c)

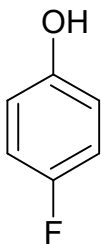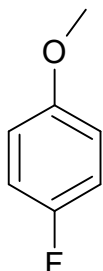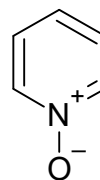

Figure S1. Chemical structure of a) choline chloride and urea, and probes used in b) solvatochromic and c) solvatomagnetic methods.

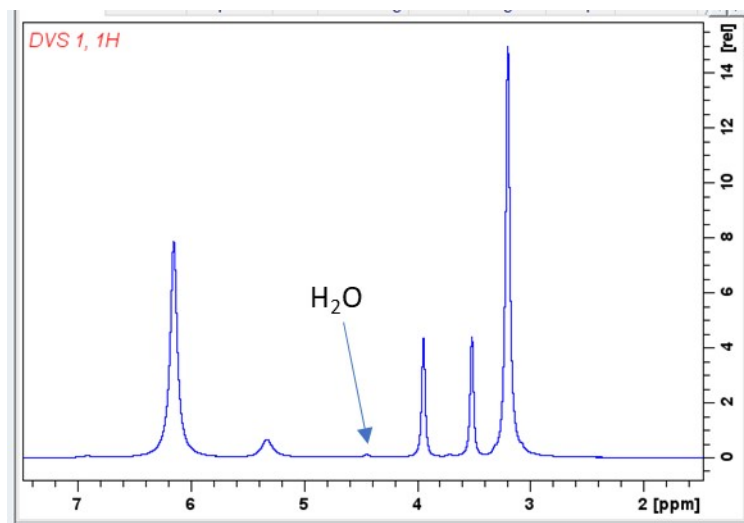

Figure S2. <sup>1</sup>H NMR spectrum of CCU<sub>12-0</sub> showing small water peak 4.4 ppm.

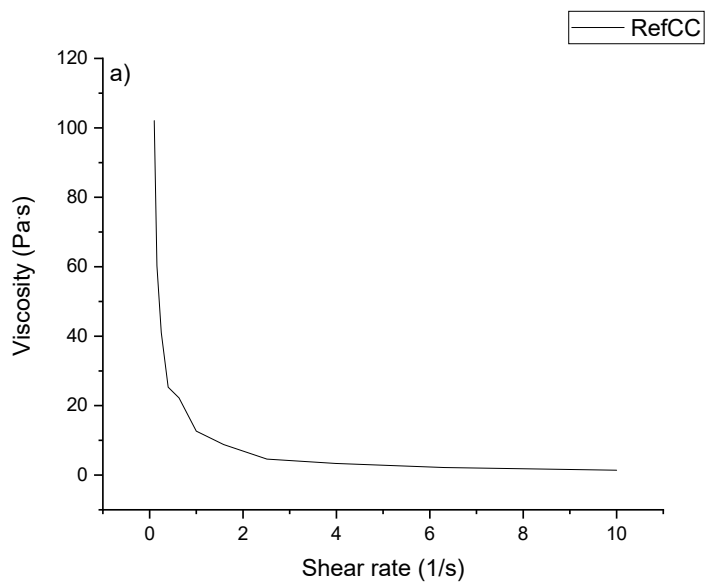

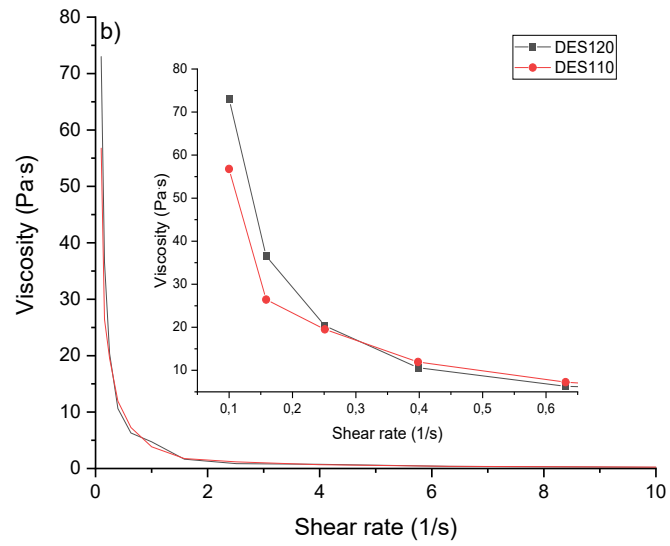

Figure S3. Viscosity of a) choline chloride-water mixture (mola ratio of 1:2) and b) DES120 and DES110 at 100°C
